1 **GENDERED GAPS TO TB PREVENTION AND CARE IN KENYA: A POLITICAL**  
2 **ECONOMY ANALYSIS STUDY.**

3

4 Leila Abdullahi<sup>1</sup>, Sandra Oketch<sup>1</sup>, Henry Komen<sup>1</sup>, Irene Mbithi<sup>2</sup>, Kerry Millington<sup>3</sup>, Stephen  
5 Mulupi<sup>3</sup>, Jeremiah Chakaya<sup>2</sup>, Eliya Zulu<sup>1</sup>

6 1. African Institute for Development Policy (AFIDEP), P.O Box 14688-00800 Nairobi,

7 Kenya. [Leyla.abdullahi@afidep.org](mailto:Leyla.abdullahi@afidep.org); [sandyvone68@gmail.com](mailto:sandyvone68@gmail.com);

8 [Henry.komen@afidep.org](mailto:Henry.komen@afidep.org); [eliya.zulu@afidep.org](mailto:eliya.zulu@afidep.org)

9 2. Respiratory Society of Kenya (ReSoK), P.O Box 14688-00800 Nairobi, Kenya.

10 [irene.mbithi@gmail.com](mailto:irene.mbithi@gmail.com); [chakaya.jm@gmail.com](mailto:chakaya.jm@gmail.com); [stevemulupi@gmail.com](mailto:stevemulupi@gmail.com)

11 3. Liverpool School of Tropical Medicine, Liverpool L3 5QA, United Kingdom

12 [Kerry.Millington@lstmed.ac.uk](mailto:Kerry.Millington@lstmed.ac.uk)

13

14

15 Corresponding author:

16 Leyla Abdullahi

17 Email: [Leyla.abdullahi@afidep.org](mailto:Leyla.abdullahi@afidep.org)

18 African Institute for Development Policy (AFIDEP),

19 Nairobi, Kenya

20

21

22

23

24 **Abstract**

25 **Background**

26 Tuberculosis (TB) remains a public health concern despite the massive global efforts towards  
27 ending TB. Kenya is among the high burdened countries globally with the TB prevention and  
28 care efforts hampered by poor health systems, resource limitations and other socio-political  
29 contexts that inform policy and implementation. Notably, TB cases are much higher in men  
30 than women, and therefore, the political economy analysis study provides in-depth contexts  
31 and understanding of the gender gaps to access and successful treatment for TB infection.

32 **Methods**

33 The Political Economy Analysis (PEA) adopted a qualitative in-depth approach that targeted  
34 16 Key Informant Interviews (KIIs). The Key Informant Interviews (KIIs) were distributed  
35 among government entities, academia, non-state actors, and community TB groups.

36 **Results**

37 The themes identified were mapped onto the applied PEA analysis framework domains. The  
38 contextual and institutional issues included gender concerns related to the disconnect between  
39 TB policies and gender inclusion aspects, such as low prioritization for TB programs, limited  
40 use of evidence to inform decisions and poor health system structures. The broad barriers  
41 influencing the social contexts for TB programs were social stigma and cultural norms such  
42 as traditional interventions that negatively impact health-seeking behaviors. The themes  
43 around the economic situation were poverty and unemployment, food insecurity, and  
44 malnutrition. The political context centered around the systemic and governance gaps in the  
45 health system from the national and devolved health functions.

46 **Conclusion**

47 Overall, broad contextual factors identified from the political economy analysis widens the  
48 disparity in targeted gender efforts toward men. Following the development of effective TB

49 policies and strategies, it is important to have well-planned gendered responsive interventions  
50 with a clear implementation plan and monitoring system to enhance access to TB prevention  
51 and care.

52 **Keywords:** TB, political economy analysis, men, gender, Kenya

53

#### 54 **Strength and limitations**

55 The study provides insights into the political, economic, and social contexts influencing TB  
56 prevention and care efforts. Additionally, to the best of our knowledge, this will be the first  
57 PEA to evaluate the TB program from a gendered perspective.

58 As a limitation, the study is missing the voices and lived experiences of men leaving with TB  
59 as this was not part of the study scope. As such, we do not have their perspectives as they  
60 may better articulate some barriers faced with access and uptake of TB prevention and  
61 management programs.

62

63

64

65

66

## 67 **BACKGROUND**

68 Globally, tuberculosis (TB) is among the leading causes of mortality in developing countries  
69 with an estimated 10.6 million people that developed TB and 1.6 million deaths in 2021[1].  
70 The TB cases were notably higher in the male compared to the female gender [1, 2] at 56.5%  
71 and 32.5%, respectively, while the prevalence for children was 11% [1]. Kenya is ranked 13<sup>th</sup>  
72 among the 22 highly burdened countries [3–5] and is exceedingly burdened by TB, TB-HIV  
73 co-infection, and multi-drug resistant TB [1, 4, 5]. In 2021, the estimated TB incidence in  
74 Kenya was 133,000 while TB mortality was 31,000 [1] with an overall disproportionately  
75 high burden in men comprising 64% of all TB cases [6].

76 The WHO End TB strategy endorsed in 2014 has set the goal for ending the TB epidemic  
77 globally by 2035 with a targeted 95% decline in TB deaths and a 90% reduction in TB  
78 incidence [7]. TB prevention and care are hampered by delayed diagnoses and treatment,  
79 poor health infrastructures, and under-reporting for TB cases [8]. Consequently, the highly  
80 burdened TB countries need to continuously focus on the priorities for TB prevention and  
81 care, such as health systems strengthening, optimizing the linkage to treatment through  
82 meeting the needs for TB services [9].

83 TB treatment involves taking anti-tuberculosis drugs for at least six to ten months which  
84 includes an intensive phase comprising the first two to three months that has a combination of  
85 a two-dose regimen and followed by a continuation phase of four or six months which has a  
86 one-dose regimen [10, 11]. However, the treatment regimen for treatment failure is up to 18  
87 months, including the first six months of the intensive phase and 12 months of the  
88 continuation phase [10]. TB patients who are undiagnosed or have poor adherence to  
89 treatment are highly infectious. Moreover, the patients with poor adherence are likely to  
90 either relapse or succumb to TB [12].

91 There have been efforts to increase access, acceptability, adherence and uptake for TB  
92 prevention and care programs to the general population and among children, including  
93 improved diagnostics [13, 14], capacity building of health care providers [15] use of mobile  
94 and digital health technologies [16], integrated screening for TB and COVID 19, TB self-  
95 testing, active case finding and contact tracing, networks for TB survivors and TB  
96 communities [10, 17–20]. Although there have been global and country-level efforts to  
97 control TB infections, the ultimate success depends on concerted efforts around targeted  
98 populations, including a gendered approach while designing TB prevention interventions [21,  
99 22]. Despite the effort to have TB gender-disaggregated data, there is a paucity of  
100 information on gender-responsive interventions to address the significantly high cases of TB  
101 among men.

102 Through the Leaving no-one behind; Transforming Gendered Pathways to Health for TB  
103 (LIGHT) Consortium ongoing work in Kenya, the African Institute for Development Policy  
104 (AFIDEP) and Respiratory Society of Kenya (ReSok) conducted a PEA study to understand  
105 the barriers to access and successful treatment for TB infection among Kenyan male  
106 adolescents and adults. The PEA study seeks to dig deeper into the gaps that lead to TB  
107 treatment interruptions and poor health-seeking behaviors among men and recommends  
108 approaches to enhance TB gender-responsive programs to improve TB access and successful  
109 treatment among men.

## 110 **OBJECTIVE**

111 To understand the political and economic contextual factors that hinders access to and  
112 successful treatment for TB infection among Kenyan male adolescents and adults.

113 Specific objectives

- 114 i. To understand the contextual factors that hinder access to and successful treatment for  
115 TB infection among Kenyan male adolescents and adults.
- 116 ii. To explore the political and power dynamics that shape opportunities and challenges  
117 towards TB gender-responsive programs.

## 118 METHODOLOGY

### 119 Study design

120 The PEA methodology is a structured qualitative approach examining power dynamics and  
121 economic and social forces influencing development. The analytical approach is informed by  
122 applied political economy

### 123 Figure 1: Conceptual framework for the PEA

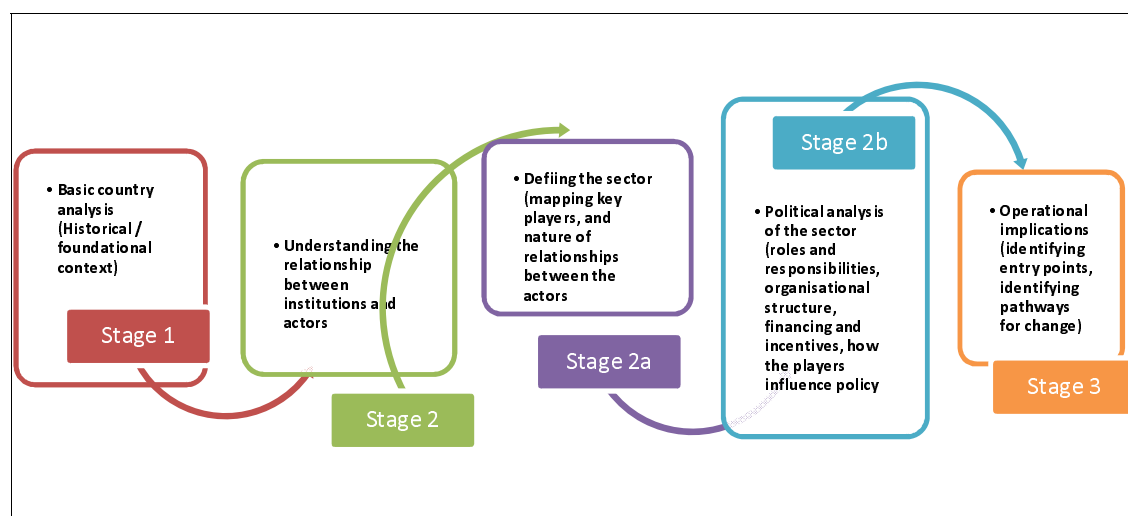

124

125 Source: Adapted from Applied political economy analysis framework [25]

### 126 Study site and population

127 Through consultations with the National TB programme implementation team, a list of study  
128 participants was generated as a starting point for data collection comprising national and  
129 county level top- and mid-level health policymakers in the TB ecosystem. The target sample  
130 included TB actors in Kenya who works alongside and/ or influence the policymakers on

131 approaches to improve access to and successful treatment of tuberculosis infection and  
 132 incidence among Kenyan male adolescents and young adults.

133 **Sampling**

134 In Jan 2023, 16 participants were purposively sampled all over Kenya using purposive,  
 135 maximum variation sampling technique. The participants included health-sector-related  
 136 government entities, civil society groups in health, individuals in research institutions  
 137 conducting health-related research, the private sector, academia with expertise on Kenya’s  
 138 political economy, TB coordinators, and, TB champions. Below is the summary of the  
 139 stakeholders interviewed and their position (**Table 1**).

140 **Table 1:** Stakeholders Interviewed

| Stakeholder groups                              | Organization/ Institution                      | Role within the institute                                      | Number |
|-------------------------------------------------|------------------------------------------------|----------------------------------------------------------------|--------|
| <b>Government Entities (MoH)</b>                | National TB Program                            | TB coordinator, TB manager                                     | 4      |
|                                                 | National Aids & STIs Control Program (NAS COP) |                                                                |        |
| <b>Universities &amp; research institutions</b> | Universities                                   | Programme manager                                              | 1      |
| <b>Health care workers</b>                      | Private health facility                        | TB program clinician                                           | 2      |
|                                                 | Public health facility                         |                                                                |        |
| <b>NGOs/partners</b>                            | Kenya Legal and Ethical Issue Network (KELIN)  | Director of program, TB programme manager, Program coordinator | 3      |
|                                                 | Centre for Health Solutions Kenya (CHS)        |                                                                |        |
|                                                 | Amref Health Africa in Kenya                   |                                                                |        |
| <b>Community TB groups</b>                      | Stop TB Partnership (STP-KE)                   | TB program coordinator, program manager                        | 6      |
|                                                 | Men Engage Kenya Network                       |                                                                |        |

|  |                               |  |  |
|--|-------------------------------|--|--|
|  | Network of TB Champions Kenya |  |  |
|--|-------------------------------|--|--|

141

142 **Data collection**

143 Data were gathered from two main sources including: desk review of LIGHT programme  
144 documents, MoH and research institutions and an in-depth interview to include PEA lenses.  
145 The desk review helped shed light on the dynamic interaction between power, institutions,  
146 and actors and how these facilitate or constrain interventions aimed at reducing the number of  
147 people affected by tuberculosis (TB) in the country.

148 **In-depth interviews**

149 A semi-structured interview guide was designed guided by the PEA framework [25] to  
150 capture information related to interaction (between power, institutions, and actors) between  
151 political interests and power dynamics that shape interventions around gendered TB and  
152 opportunities and pathways for greater impact in reducing the number of people affected by  
153 tuberculosis (TB) in the country. The semi-structured interview guide had a mix of open- and  
154 closed-ended questions. Interview participants were recruited and followed up using email  
155 and telephone. All the interviews were conducted virtually using Microsoft Teams. All the  
156 interviews were audio recorded, and transcribed after obtaining written informed consent.  
157 The interview transcripts were anonymised and stored in a password-protected file accessible  
158 only to the project team.

159 **Data analysis**

160 Data from the qualitative interviews were analyzed using a combination of inductive and  
161 deductive approaches utilizing the framework thematic approach [23, 24]. Transcripts were  
162 coded using the Dedoose software by two members for joint review through a series of  
163 meetings. The codes were then mapped onto the domains from the applied PEA analysis  
164 framework [25] while identifying emerging themes and sub-themes.



165 **RESULTS**

166 **Contextual and Structural issues**

167 *Gender concerns related to TB care*

168 Men account for roughly twice the TB burden while displaying extremely low health-seeking  
169 behaviors with the highest TB treatment interruptions [26–28]. Further, men with a TB  
170 infection face unfavorable outcomes of TB deaths and treatment failure possibly due to non-  
171 adherence to treatment [26, 28]. The qualitative inquiry reported on the concerns around  
172 limited targeted interventions towards men which in turn do not meet the needs of men,  
173 thereby influencing their overall access to TB services.

174 *“Most of the time, more men than women get tuberculosis, which is a problem. .... I*  
175 *agree that most women now are more empowered but they're leaving out men”*. (KII,  
176 TB Champion, 2022)

177 *“...., there are minimal interventions with TB in Kenya geared towards men. We don't*  
178 *focus on men regarding case finding, meeting their needs, and so on, which is quite*  
179 *unfortunate”*. (KII, Development Partner, 2022)

180 Kimani et al 2021 recommended that actors should actively target men with systematic TB  
181 screening and diagnostic services to ensure early diagnosis and interrupt transmission [29].  
182 The recommendation aligns with the majority of the key informant responses where  
183 participants emphasized the need to invest in male-friendly diagnostic and screening services,  
184 with the aim of reducing undiagnosed TB.

185 *“The social workplace and networks of TB stakeholders are increasingly being taken*  
186 *into consideration rather than visiting men at their homes”*. (KII, TB Coordinator,  
187 2022)

188 *“Since men are more likely to be affected than women, we usually focus on places*  
189 *where men gather, such as social places”*. (KII, Development Partner, 2022)

190           *“Focusing on men gathering places as potential intervention spaces is important if we*  
191           *are to reduce the burden of TB and achieve the End TB targets”*. (KII, MoH,2022)

192    *Health infrastructure*

193    In Kenya, there exist broad TB diagnostic tests in urban compared to rural settings thereby  
194    higher costs in the health facilities in urban areas [27, 30, 31]. Further, the public health care  
195    system is overworked and with very high waiting times thereby limiting access to the  
196    impoverished population that would otherwise seek care in these facilities [32]. Additionally,  
197    there are reported logistical issues around access to TB services where the health facilities are  
198    in far-off areas [31]. Therefore, a need to decentralize treatments offering TB services [33].  
199    Overall, the high TB treatment costs is attributed to a wide range of factors such as laboratory  
200    costs, drug prices, nutritional support and hospitalization costs [30]. The participants from the  
201    qualitative finding echoed the need to have TB services more accessible by equipping more  
202    hospitals with the necessary resources and offering flexible times to meet the needs of  
203    patients beyond the 8 am-5 pm working hours. These efforts would largely lead to the  
204    expansion of TB services to men who are casual laborers who work during the day.

205           *“Some facilities do not offer TB services as expected, there is a need to have more*  
206           *healthcare staff and equipped facilities in Kenya offering TB services”*. (KII, Health  
207           care practitioner, 2022)

208           *“The Arid and Semi-Arid Land area harbors vulnerable and pastoralist communities*  
209           *that have additional challenges to access health care due to the fixed hospital*  
210           *working hours of between 8am to 5 pm. This timing limits casual laborers who are*  
211           *faced with the competing needs of work to provide for their families against seeking*  
212           *medication”*. (KII, TB Champion, 2022)

213           *“Participants recommended that health centers offering TB services be flexible and*  
214           *offer services on the weekend to suit everyone”*. (KII, policy maker,2022)

## 215 **Social and Economic Context**

### 216 *Social and cultural norms*

217 In Kenya, the high TB burden mostly in men [26] is partly attributed to poor health-seeking  
218 behavior which is attributed to cultural norms and traditional beliefs. The cultural beliefs lead  
219 to seeking traditional interventions including a preference for alternative medicine thereby  
220 taking longer to get medical help or TB treatment attrition [26, 31, 34–36]. Furthermore,  
221 social stigma attributed to TB and HIV/AIDS increases patients' delay to treatment [34].

222 *“There is a stigma attached to TB and is scary. ...If you delay TB diagnosis, you*  
223 *become slim and thin and people mistake it for HIV. The stigma associated with HIV*  
224 *and TB has created late case detection or missed cases”.* (KII, TB champion, 2022).

### 225 *Poverty and Unemployment*

226 The Africa Development Bank (AfDB) reports that the inflation in Kenya was at 6.1% in  
227 2021 with a public debt surge of 68%. Additionally, the proportion of Kenyans living in  
228 extreme poverty was 16%, and unemployment at 12.3% [37]. Consequently, poverty makes it  
229 easier for TB to spread, mainly because it affects living conditions (people living in  
230 overcrowded, poorly ventilated homes) [38]. Further, poverty leads many people to hesitate  
231 medical treatment and seek cheap alternate treatments such as herbal medications [39].

232 In Kenya, unemployment is a major contributor to TB treatment interruptions and lost to  
233 follow-up [26, 27]. Consequently, men who are the sole breadwinner and rely on daily wages  
234 face the hurdle of providing for the family or seek care for ailments or worrying symptoms  
235 [26]. The study participants emphasized on the unemployment effects on to poor health  
236 outcomes such as the inability to pay for medical care while ill and the usage of drugs at  
237 reduced dosages necessitated by the logistical and access costs, which leads to drug resistance  
238 in the body. Worthwhile to note, even though TB treatment is free in public health facility,

239 however, the 8-5 pm working hours hinder the men from seeking care as they are working to  
240 obtain their daily wages.

241 *“Unemployment affects health because if you have no money, you cannot go to the*  
242 *hospital when sick. Also, you can’t afford drugs you go for half doses creating drug*  
243 *resistance in the body”*. (KII, Development Partner, 2022)

244 Further, the majority of the participants described the poor state of the economy which has  
245 been exacerbated by the COVID-19 pandemic which led to the loss of jobs and high costs of  
246 living.

247 *Most people lost their jobs after corona and now jobs are very scarce impacting TB*  
248 *access*. (KII, Health care practitioner, 2022)

249 *Food insecurity and malnutrition*

250 Like other countries, Kenya is affected by climate change brought on by global warming  
251 thereby affecting agriculture and food security [40, 41]. Food has a long-term impact on  
252 health since it can lead to malnutrition and mental health [40, 41]. TB patients with severe  
253 malnutrition have higher risks of failure rates or deaths [28] and it is a key driver of the TB  
254 epidemic in Kenya [42]. Therefore, a substantial contributor to TB in Kenya is food  
255 insecurity. The interviewed participants agreed that most Kenyans, including males, focus on  
256 food and daily sustenance rather than healthcare since it has reached a point where it is  
257 equated to a life-or-death situation.

258 *“...., because of global warming, we are experiencing a lack of rain, leading to drought*  
259 *and famine, so everyone is more concerned with food and daily nourishment than*  
260 *health care”*. (KII, Development Partner, 2022)

261 **Political Context**

262 *The country and its devolved counties*

263 Since 2010, due to the devolved system, each county in Kenya has had a different level of  
264 efficiency in providing healthcare services [43]. The qualitative inquiry findings showed that  
265 the counties are struggling and need to improve the situation regarding their decisions, which  
266 is especially low in TB programs. Most counties indicated that the national government only  
267 provides them with meager funding, with a further low prioritization on TB programs by the  
268 county health teams. Additionally, most participants indicated that corruption and lack of  
269 coordination between national and county government plays a major role towards poor health  
270 service delivery.

271 *“The health sector is really struggling because of how the health services are being*  
272 *run. The counties are having a hard time, and the national decision-making process*  
273 *isn’t making things better at the county level”*. (KII, Policymaker, 2022)

274 *“They get a lot of money and allowances, which they use to benchmark in places like*  
275 *Dubai. And sometimes they choose to buy furniture ...”*. (KII, Health care practitioner,  
276 2022)

277 *“... They must depend on the national government. We are behind other countries in*  
278 *finding cases because of this. Based on the report from last year, we didn't diagnose*  
279 *close to 50% of the people we were supposed to”*. (KII, TB Coordinator, 2022)

## 280 **Institutional environment**

### 281 *TB policies and gender*

282 Overall, TB policies and strategy implementation in Kenya have been hampered by limited  
283 budgetary allocations [44]. The policy analysis revealed that various components of active  
284 TB including management and diagnosis were included in Kenya’s National Strategic Plan  
285 for TB and Lung Health 2019-2023 [45]. However, the policies/strategies lack a gendered

286 approach to address men’s barriers to TB care. These findings were validated by the  
287 qualitative study which pointed out the overlook from policymakers and implementers on the  
288 gender influences on tuberculosis and its control.

289 *“We have policies and guidelines, but none talk about a specific gender. Instead, they*  
290 *cover everyone. But we’ve found that TB affects men more than women. This is a hot*  
291 *topic, and we need to consider gender issues in TB care and prevention.” (KII,*  
292 *Policymaker, 2022)*

293 It is evident from the data that men are more burdened with regards to the highest TB  
294 mortality  
295 [1, 2] with minimal interventions targeting men. The consideration for a gendered  
296 interventions/approach should stem from the National TB programme and partners meetings,  
297 where there is strengthened advocacy for targeted gendered approaches for TB care and  
298 prevention among young males and elderly persons.

299 *“Based on survey results, men are more affected and wait longer to get help. So, TB is*  
300 *different for men and women in some ways. So, TB policy planning and advocacy*  
301 *should include both men and women, ..., you should focus on other ways to reach*  
302 *them.” (KII, Academician, 2022)*

### 303 *Evidence-Informed Decision-Making capacity gap*

304 Skills in evidence synthesis, utilization, and communication are vital among policymakers,  
305 Civil Society Organisations (CSO), researchers, and media to communicate findings to  
306 stakeholders including the community [43]. Most of the research participants identified  
307 capacity gaps in the translation of evidence that hinders the dissemination of research  
308 findings to inform healthcare decision-making. Respondents from the development partner  
309 suggested an online TB research hub to disseminate research findings in a plain language  
310 summary to aid decision-makers in their decision-making process.

311           “..., but most of it [research] doesn't get to the people who make policy because it isn't  
312           shared with them. They can't use it to decide what to do or develop policies. So, if there  
313           were, you know, research hubs, I think that would go a long way toward helping us get  
314           all this information together”. (KII, Development Partner, 2022)

315   Additionally, participants concurred to the need for the researchers to break down technical  
316   research information for easy consumption by all actors who use evidence for decision  
317   making such as policymakers, and legislators, among other key stakeholders.

318           “...investing in the capacity on communication strategy will help to deliver the  
319           dedicated TB messages to policymakers and the community at large”. (KII,  
320           Development Partner, 2022)

321   Importantly, the research participants indicated the need for a dedicated staff member within  
322   the government sector who will support the coordination and collaboration of the government  
323   TB sector with research institutes including universities, development partners, and NGOs,  
324   where a number of innovative research are ongoing. Through increasing capacity, young  
325   upcoming researchers can receive mentorship from senior researchers on emerging  
326   technologies for TB management and diagnosis. Importantly, through knowledge-sharing  
327   platforms like digital technology, the community can gain awareness and knowledge while  
328   dispelling pre-existing myths and prejudices concerning TB.

329           “*The problem is to do with resources. There is a need to add more resources to the*  
330           *research sector. They need to have specific staff that deals with research.*  
331           *Collaboration between organizations, e.g., universities, will also work*”. (KII,  
332           Healthcare Practitioner, 2022)

### 333   **TB Actors in Kenya**

334   TB as a public issue in Kenya that has attracted a diverse set of actors in government (at the  
335   three levels), non-state actors, and development partners. The degree of involvement of these

336 actors is informed by their interests, roles and power relations in the TB control program.  
337 Overall, the Ministry of Health plays a central role in the management of TB in the country.  
338 The National Tuberculosis and Leprosy Control Programme (NTP) controls most of the  
339 funding for TB work in the country. The National level actors including the researchers,  
340 community, healthcare professionals, TB champions, development partners, civil society  
341 actors, and politicians are occasionally engaged in various forums, including TB Technical  
342 Working Group (TWG), on the issue TB care and prevention. However, an action plan with  
343 gender-responsive approaches is still missing.

#### 344 *Roles and power relations*

345 The Directorate of Preventive and Promotive Health in the Ministry of Health provides the  
346 overall leadership on TB prevention and care [46]. The NTP provides a key interface between  
347 policy, strategic planning, and practice, where they offer technical assistance and decisions  
348 around TB prevention and care at the national and county level [47, 48]. Furthermore, The  
349 NTP has had significant reforms in the past decades where activities aimed at ending TB  
350 have been decentralized to the county level (previously known as the district level).  
351 Consequently, the decentralization process has strengthened the county-level power and  
352 responsibility for priority setting, budget allocation, and training [47, 48]. To note, the  
353 resource and allocation of health resources is both a technical and political process [49]. The  
354 county health management teams spearheaded by the county TB coordinators develop the TB  
355 budgets and work plans while the political leaders are included in the resource allocation  
356 processes [49]. However, there exists political interference around the health sector utility  
357 and budgeting at the county levels [47].

358 Kenya is heavily reliant on Development partners for TB financing [48] with reported  
359 challenges on limited funding and poor collaborations of TB programs with the private health



360 sectors [50, 51]. Development partners have largely contributed to the annual global funding  
361 towards ending TB with reported funding gaps in recent years [48, 52] and have pushed for  
362 adoption of program-based budgeting to facilitate resource allocations and prioritizations [53,  
363 54].

364 The qualitative findings show an urgent need for the government to prioritize TB funding in  
365 the country. *“Up to 80% of TB funding is from donors, thus risking sustainability”.*

366 *“If NTP doesn't get enough money from the national government, which is especially*  
367 *true now. With some donors giving less money, it's easy to see how this could be a big*  
368 *problem for the country”.* (KII, TB Coordinator, 2022)

369 In Kenya, few NGOs like The Kenya Legal & Ethical Issues Network on HIV and AIDS  
370 (KELIN) have segregated gendered guidelines and services where they offered gendered  
371 services in a structured way. KELIN organization concentrate on specific interventions  
372 involving men in the workforce. The organization has an initiative that goes to areas where  
373 men are available, including their leadership. Some of the interventions include performing  
374 screenings and health education.

375 *“Our guidelines call for different kinds of service delivery. Since men are more likely to*  
376 *be affected than women, we usually focus on places where men gather, such as social*  
377 *places”.* (KII, Development Partner, 2022)

378 *“Stigmatized men are being attended to during specific times of their convenience.*  
379 *Because health-seeking behavior among men is poor, they are being attended to;*  
380 *awareness, screening, and delivery of medicines at their convenient places”.* (KII, TB  
381 Champion, 2022).

382           *“Men should be targeted where they are, rather than waiting for them to come to*  
383           *treatment centers, to ensure they do not miss out on their jobs while seeking or*  
384           *receiving care. They do not forfeit their pay”*. (KII, TB Coordinator, 2022)

385   The Stop TB Partnership and TB champions have played a significant role in raising  
386   awareness regarding gender and human rights through their Communities, Rights, and  
387   Gender (CRG) initiative. The interventions help to find cases, raise awareness, or participate  
388   in any community-based TB response. The organizations actively engage. with funders,  
389   including the Global Fund and the US government, among others, to mobilize financial  
390   resources for TB initiatives and to undertake community awareness and dialogues.

391           *“We have been making the people we work with more aware. We look at it regarding*  
392           *gender and human rights. We have taught them about gender and human rights so*  
393           *that when they go out into the community to look for TB cases, raise awareness, or*  
394           *make any other community-based TB response, they are aware of the gender and*  
395           *rights of the community”*. (KII, TB Coordinator, 2022)

396   Communities have the potential to improve overall TB treatment outcomes at minimal costs  
397   [55]. Additionally, the inclusion of TB care and other health care in the communities largely  
398   improves acceptance and access [55, 56]. The qualitative inquiry reported that most  
399   communities are slowly changing and are becoming positive and receptive to TB programs  
400   involving TB policies, including men, women, and the community at large. Further, there’s a  
401   need to focus on more sensitization, awareness, and capacity building of community  
402   members, Community Health Volunteers (CHVs), TB champions, healthcare workers, and  
403   policymakers.

404 *“Most communities are changing and are open to TB programs, ..... To amplify*  
405 *further, the focus needs to be on raising awareness, lobbying for resources, and*  
406 *leadership, and getting everyone on board.”* (KII, TB Champion, 2022)

407 Civil society organizations have a keen interest in ending TB and incorporated community  
408 interventions including the use of TB champions to create awareness.

409 *“The social workplace and networks of TB stakeholders are increasingly being taken*  
410 *into consideration rather than visiting men at their homes. Community Rights and*  
411 *Gender (CRG) is being included as a subject area by the Network of TB Champions as*  
412 *it advances from the entire cascade regarding prevention, care, and cure”.* (KII, TB  
413 Coordinator, 2022)

#### 414 **DISCUSSION**

415 Reducing the global TB burden requires concerted efforts such as a focus on gender,  
416 institutional and socio-political lens that are essential aspects in the TB prevention and care  
417 cascade that will ultimately contribute to efficient and effective programming. There were  
418 notable concerns around gender disparity with high TB treatment interruptions and default  
419 among the male compared to their female counterpart [57, 58]. This study further noted the  
420 need for targeted gender-responsive interventions and development of progressive policies to  
421 improve men’s health seeking behaviors. Additionally, the targeted interventions need to  
422 consider structural system such as surveillance of loss to follow-up, decentralized TB  
423 services that actually reach even the marginalized populations, and reduce other opportunity  
424 costs associated with the treatment. The need for targeted gender-responsive TB interventions  
425 is consistent to other study findings, including a study done across highly burdened TB  
426 countries which reported on the need to consider efficient mechanisms in the policy and  
427 administration, including innovative financing policy options for successful gender-  
428 responsive TB implementation guidelines and policies [59]. Moreover, mitigating the

429 opportunity costs associated with treatment, such as time loss, income, long distance to  
430 treatment and household expenditures is a consistent finding from other settings [60] which  
431 leads to increased access to health services.

432 The Rio political Declaration held in 2011, emphasize on the need to address inequalities and  
433 inequities around the social determinants of health including giving special attention to  
434 gender-related aspects [59]. One key social determinant impeding TB treatment and  
435 completion are socio-cultural beliefs, such as the use of alternative medicines and social  
436 stigma have been reported in various studies [61–64]. There is an urgent need to necessitate  
437 culturally sensitive health education on TB disease targeting men including clarifying any  
438 myths and misperceptions and enhancing positive attitudes towards TB disclosure. The  
439 second reported determinant that hampers TB treatment and care is poverty which, is  
440 concurrent with other reported findings [65, 66]. This therefore stresses on the need for good  
441 public health strategies [67] and socio-economic empowerment interventions [66].  
442 Furthermore, the negative impacts from the global warming call for healthcare systems  
443 preparedness in dealing with the health impacts of the climate change like malnutrition due to  
444 drought. However, the majority of the countries including Kenya are not sufficiently prepared  
445 [40]. This, therefore, calls for concerted efforts around the country’s financial, logistical and  
446 systemic response.

447 This PEA found that evidence-informed decision-making is a key strategy to inform decision  
448 towards sustainable efforts towards ending TB. Skills in evidence synthesis and utilization  
449 are vital among governments, research, and implementing partners to inform the decision-  
450 making process [68, 69]. To achieve this, research needs to be prioritized at the country and  
451 regional level with adequate dissemination capacity to inform policy and practice [70–72].  
452 These often times are impeded by different political prioritizations such as poor governance,  
453 limited financial and budgetary prioritizations [59].

454 On the other hand, the researchers need to assist TB implementers in identifying the issues  
455 contributing to gender disparity in seeking health care. Importantly, Kenya must adapt its  
456 resource-allocation culture to ensure the planned gender-responsive strategies are funded to  
457 ensure successful implementation and monitoring. The government and other TB  
458 stakeholders can brainstorm on interventions to combat TB in a gender-transformative  
459 manner. For example, the government can put the already developed policies into practice  
460 with the necessary human and financial resources.

## 461 **CONCLUSION**

462 This PEA study demonstrates an interplay of politics and other socio-dynamics in the health  
463 decision-making and implementation space. Overall, there exist broad contextual factors  
464 identified from the political economy analysis that ultimately widens the disparity in targeted  
465 gender efforts toward men. Following the development of effective TB policies and  
466 strategies, it is important to have well-planned gendered responsive interventions with a clear  
467 implementation plan and monitoring system to enhance access to TB prevention and care.  
468 Moreover, capacity strengthening among researchers and policymakers on how to translate  
469 evidence into an actionable recommendation is vital to inform decision-making.

### 470 Recommendations:

- 471 • TB stakeholders need to include gender-responsive plans, interventions and strategies  
472 in existing policies to address gender disparities in TB care and treatment cascade.
- 473 • There is an urgent need to mobilize, and earmark resources to enable the successful  
474 implementation and sustainable gender-responsive approaches for TB care and  
475 treatment.
- 476 • Stakeholder engagement and collaboration are critical to implementing effective  
477 gendered TB policies to end TB. Most importantly, engaging with communities can

478            establish a better understanding of real-life issues to inform evidence-based policies

479            that address the specific needs of men and women.

480

481

482

483

484

485

486 **REFERENCES**

- 487 1. Global Tuberculosis Report 2022. [https://www.who.int/teams/global-tuberculosis-](https://www.who.int/teams/global-tuberculosis-programme/tb-reports/global-tuberculosis-report-2022)  
488 [programme/tb-reports/global-tuberculosis-report-2022](https://www.who.int/teams/global-tuberculosis-programme/tb-reports/global-tuberculosis-report-2022). Accessed 27 Mar 2023.
- 489 2. Law I, Floyd K, Abukaraig EAB, Addo KK, Adetifa I, Alebachew Z, et al. National  
490 tuberculosis prevalence surveys in Africa, 2008-2016: an overview of results and lessons  
491 learned. *Trop Med Int Health*. 2020;25:1308–27.
- 492 3. Figueroa-Munoz J, Palmer K, Dal Poz MR, Blanc L, Bergström K, Raviglione M. The  
493 health workforce crisis in TB control: A report from high-burden countries. *Hum Resour*  
494 *Health*. 2005;3:1–9.
- 495 4. Ministry of Health, Kenya. National Strategic Plan for Tuberculosis, Leprosy and Lung  
496 Health 2015 - 2018.
- 497 5. Toczek A, Cox H, Du Cros P, Cooke G, Ford N. Strategies for reducing treatment default  
498 in drug-resistant tuberculosis: systematic review and meta-analysis. *Int J Tuberc Lung Dis*.  
499 2013;17:299–307.
- 500 6. Ministry of Health, Kenya. National Tuberculosis, Leprosy and Lung Disease Program  
501 Annual Report. 2019.
- 502 7. Uplekar M, Weil D, Lonroth K, Jaramillo E, Lienhardt C, Dias HM, et al. WHO's new  
503 end TB strategy. *The Lancet*. 2015;385:1799–801.
- 504 8. Kasse Y, Jasseh M, Corrah T, Donkor SA, Antonnio M, Jallow A, et al. Health seeking  
505 behaviour, health system experience and tuberculosis case finding in Gambians with cough.  
506 *BMC Public Health*. 2006;6:1–8.
- 507 9. Vesga JF, Hallett TB, Reid MJA, Sachdeva KS, Rao R, Khaparde S, et al. Assessing  
508 tuberculosis control priorities in high-burden settings: a modelling approach. *Lancet Glob*  
509 *Health*. 2019;7:e585–95.

- 510 10. Ministry of Health, Kenya. Integrated Guideline for Tuberculosis, Leprosy and Lung  
511 Disease. 2021.
- 512 11. Ministry of Health, Kenya. Guidelines on the programmatic management of tuberculosis  
513 preventive therapy (PMTPT). 2020.
- 514 12. Munro SA, Lewin SA, Smith HJ, Engel ME, Fretheim A, Volmink J. Patient adherence to  
515 tuberculosis treatment: a systematic review of qualitative research. *PLoS Med.* 2007;4:1230–  
516 45.
- 517 13. Engel N, Ochodo EA, Karanja PW, Schmidt BM, Janssen R, Steingart KR, et al. Rapid  
518 molecular tests for tuberculosis and tuberculosis drug resistance: a qualitative evidence  
519 synthesis of recipient and provider views. *Cochrane Database Syst Rev.* 2022;4.
- 520 14. Smith JP, Song R, Mccarthy KD, Mchembere W, Click ES, Cain KP. Clinical and  
521 Radiologic Factors Associated With Detection of *Mycobacterium tuberculosis* in Children  
522 Under 5 Years old Using Invasive and Noninvasive Sample Collection Techniques-Kenya.  
523 *Open Forum Infect Dis.* 2022;9.
- 524 15. Angala P, Dlodlo RA, Wanjala S, Mamo G, Mugambi-Nyaboga L, Okoth EO, et al. TB  
525 training in Kenya: building capacity for care and prevention. *Public Health Action.*  
526 2022;12:40.
- 527 16. Yah CS, Tambo E, Khayeka-Wandabwa C, Ngogang JY. Impact of telemonitoring  
528 approaches on integrated HIV and TB diagnosis and treatment interventions in sub-Saharan  
529 Africa: a scoping review. *Health Promot Perspect.* 2017;7:60–5.
- 530 17. Mbithi I, Thekkur P, Chakaya JM, Onyango E, Owiti P, Njeri NC, et al. Assessing the  
531 Real-Time Impact of COVID-19 on TB and HIV Services: The Experience and Response  
532 from Selected Health Facilities in Nairobi, Kenya. *Trop Med Infect Dis.* 2021;6.



- 533 18. Deya RW, Masese LN, Jaoko W, Muhwa JC, Mbugua L, Horne DJ, et al. Yield and  
534 Coverage of Active Case Finding Interventions for Tuberculosis Control:A Systematic  
535 Review and Meta-analysis. *Tuberc Res Treat.* 2022;2022:1–12.
- 536 19. Szkwarko D, Amisi JA, Peterson D, Burudi S, Angala P, Carter EJ. Using a mobile  
537 application to improve pediatric presumptive TB identification in western Kenya. *Int J*  
538 *Tuberc Lung Dis.* 2021;25:468–74.
- 539 20. Khundi M, Carpenter JR, Nliwasa M, Cohen T, Corbett EL, MacPherson P. Effectiveness  
540 of spatially targeted interventions for control of HIV, tuberculosis, leprosy and malaria: a  
541 systematic review. *BMJ Open.* 2021;11.
- 542 21. Chikovore J, Pai M, Horton KC, Daftary A, Kumwenda MK, Hart G, et al. Missing men  
543 with tuberculosis: the need to address structural influences and implement targeted and  
544 multidimensional interventions. *BMJ Glob Health.* 2020;5:e002255.
- 545 22. Medina-Marino A, Bezuidenhout D, Ngcelwane N, Cornell M, Wainberg M, Beyrer C, et  
546 al. Qualitative Identification of Intervention Preferences to Support Men’s Engagement and  
547 Retention in TB Care in South Africa. *Am J Mens Health.* 2022;16.
- 548 23. Gale NK, Heath G, Cameron E, Rashid S, Redwood S. Using the framework method for  
549 the analysis of qualitative data in multi-disciplinary health research. *BMC Med Res*  
550 *Methodol.* 2013;13:1–8.
- 551 24. Smith J, Firth J. Qualitative data analysis: the framework approach. *Nurse Res.*  
552 2011;18:52–62.
- 553 25. Harris D. Applied political economy analysis A problem-driven framework *Methods and*  
554 *Resources.* 2013.
- 555 26. Muture BN, Keraka MN, Kimuu PK, Kabiru EW, Ombeka VO, Oguya F. Factors  
556 associated with default from treatment among tuberculosis patients in Nairobi province,  
557 Kenya: a case control study. *BMC Public Health.* 2011;11.

- 558 27. Kizito KW, Dunkley S, Kingori M, Reid T. Lost to follow up from tuberculosis treatment  
559 in an urban informal settlement (Kibera), Nairobi, Kenya: what are the rates and  
560 determinants? *Trans R Soc Trop Med Hyg.* 2011;105:52–7.
- 561 28. Kiplimo R, Kosgei M, Mwangi A, Onyango E, Ogero M, Koske J. Longitudinal-Survival  
562 Models for Case-Based Tuberculosis Progression. *Front Public Health.* 2021;9:127.
- 563 29. Kimani E, Muhula S, Kiptai T, Orwa J, Odero T, Gachuno O. Factors influencing TB  
564 treatment interruption and treatment outcomes among patients in Kiambu County, 2016-  
565 2019. *PLoS One.* 2021;16.
- 566 30. Kairu A, Orangi S, Oyando R, Kabia E, Nguhiu P, Ong’ang’o J, et al. Cost of TB services  
567 in healthcare facilities in Kenya. *The International Journal of Tuberculosis and Lung Disease.*  
568 2021;25:1028.
- 569 31. Rachlis B, Naanyu V, Wachira J, Genberg B, Koech B, Kamene R, et al. Identifying  
570 common barriers and facilitators to linkage and retention in chronic disease care in western  
571 Kenya. *BMC Public Health.* 2016;16:1–15.
- 572 32. Azevedo MJ. The State of Health System(s) in Africa: Challenges and Opportunities.  
573 *African Histories and Modernities.* 2017;:1–73.
- 574 33. Kangangi JK, Kibuga D, Muli J, Maher D, Billo N, N’gang’ L, et al. Decentralisation of  
575 tuberculosis treatment from the main hospitals to the peripheral health units and in the  
576 community within Machakos district, Kenya. 2003.
- 577 34. Liefoghe R, Baliddawa JB, Kipruto EM, Vermeire C, De Munynck AO. From their own  
578 perspective. A Kenyan community’s perception of tuberculosis. *Trop Med Int Health.*  
579 1997;2:809–21.
- 580 35. Mbuthia GW, Olungah CO, Ondicho TG. Health-seeking pathway and factors leading to  
581 delays in tuberculosis diagnosis in West Pokot County, Kenya: A grounded theory study.  
582 *PLoS One.* 2018;13:e0207995.

- 583 36. Mbuthia GW, Olungah CO, Ondicho TG. Knowledge and perceptions of tuberculosis  
584 among patients in a pastoralist community in Kenya: a qualitative study. *Pan Afr Med J.*  
585 2018;30.
- 586 37. Kenya Economic Outlook | African Development Bank - Building today, a better Africa  
587 tomorrow. <https://www.afdb.org/en/countries-east-africa-kenya/kenya-economic-outlook>.  
588 Accessed 27 Mar 2023.
- 589 38. Barter DM, Agboola SO, Murray MB, Bärnighausen T. Tuberculosis and poverty: The  
590 contribution of patient costs in sub-Saharan Africa - A systematic review. *BMC Public*  
591 *Health.* 2012;12:1–21.
- 592 39. Msoka EF, Orina F, Sanga ES, Miheso B, Mwanyonga S, Meme H, et al. Qualitative  
593 assessment of the impact of socioeconomic and cultural barriers on uptake and utilisation of  
594 tuberculosis diagnostic and treatment tools in East Africa: a cross-sectional study. *BMJ Open.*  
595 2021;11:e050911.
- 596 40. Opoku SK, Filho WL, Hubert F, Adejumo O. Climate Change and Health Preparedness in  
597 Africa: Analysing Trends in Six African Countries. *International Journal of Environmental*  
598 *Research and Public Health* 2021, Vol 18, Page 4672. 2021;18:4672.
- 599 41. Sheriff M, Mash R. Climate change and primary health care in Chakama, Kilifi County,  
600 Kenya. *Afr J Prim Health Care Fam Med.* 2022;14.
- 601 42. Ministry of Health, Kenya. National Tuberculosis, Leprosy and Lung Disease Annual  
602 Report. 2019.
- 603 43. Mulupi S, Ayakaka I, Tolhurst R, Kozak N, Shayo EH, Abdalla E, et al. What are the  
604 barriers to the diagnosis and management of chronic respiratory disease in sub-Saharan  
605 Africa? A qualitative study with healthcare workers, national and regional policy  
606 stakeholders in five countries. *BMJ Open.* 2022;12:e052105.

- 607 44. Faust L, Ruhwald M, Schumacher S, Pai M. How are high burden countries  
608 implementing policies and tools for latent tuberculosis infection? A survey of current  
609 practices and barriers. *Health Sci Rep*. 2020;3.
- 610 45. Ministry of Health, Kenya. National Strategic Plan 2019 – 2023 – NLTP.  
611 <https://www.nltp.co.ke/national-strategic-plan-2019-2023/>. Accessed 27 Mar 2023.
- 612 46. Ministry of Health, Kenya. Departments – MINISTRY OF HEALTH.  
613 <https://www.health.go.ke/about-us/departments/>. Accessed 2 May 2023.
- 614 47. Tsofa B, Musotsi P, Kagwanja N, Waithaka D, Molyneux S, Barasa E, et al. Examining  
615 health sector application and utility of program-based budgeting: County level experiences in  
616 Kenya. *Int J Health Plann Manage*. 2021;36:1521–32.
- 617 48. Hanson C, Kibuga D, Bank W. Effective tuberculosis control and health sector reforms in  
618 Kenya: challenges of an increasing tuberculosis burden and opportunities through reform.  
619 *INT J TUBERC LUNG DIS*. 2000;4:627–32.
- 620 49. Kirirgia J, Sambo L, Agu V, journal EL-EA medical, 2001 undefined. How to develop an  
621 operational plan for health. [ajol.info](http://ajol.info).
- 622 50. Uplekar M. Public-private mix for tuberculosis care and prevention. What progress?  
623 What prospects? *Int J Tuberc Lung Dis*. 2016;20:1424–9.
- 624 51. Lei X, Liu Q, Escobar E, Philogene J, Zhu H, Wang Y, et al. Public-private mix for  
625 tuberculosis care and control: a systematic review. *Int J Infect Dis*. 2015;34:20–32.
- 626 52. Chakaya J, Petersen E, Nantanda R, Mungai BN, Migliori GB, Amanullah F, et al. The  
627 WHO Global Tuberculosis 2021 Report – not so good news and turning the tide back to End  
628 TB. *International Journal of Infectious Diseases*. 2022;124:S26–9.
- 629 53. Worthington R. Performance and Programme-Based Budgeting in Africa: A Status  
630 Report 2013. *SSRN Electronic Journal*. 2013. <https://doi.org/10.2139/SSRN.3057023>.

- 631 54. Lakin J, Torbert S, Hasan S. Program Budget Structure in the Health Sector A Review of  
632 Program-Based Budgeting Practices in Low-and Middle-Income Countries. 2018.
- 633 55. Maher D. The role of the community in the control of tuberculosis. *Tuberculosis*.  
634 2003;83:177–82.
- 635 56. Chamie G, Kwarisiima D, Clark TD, Kabami J, Jain V, Geng E, et al. Leveraging Rapid  
636 Community-Based HIV Testing Campaigns for Non-Communicable Diseases in Rural  
637 Uganda. *PLoS One*. 2012;7:e43400.
- 638 57. Theobald S, Tolhurst R, Squire SB. Gender, equity: new approaches for effective  
639 management of communicable diseases. *Trans R Soc Trop Med Hyg*. 2006;100:299–304.
- 640 58. Vijay S, Balasangameshwara V, Jagannatha P, Saroja V, Shivashankar B, Jagota P. Pre-  
641 treatment outcome of smear positive tuberculosis cases under DOTS in Bangalore city.  
642 *Indian J Tuberc*. 2002.
- 643 59. Munodawafa D, Onya H, Amuyunzu-Nyamongo M, Mweemba O, Phori P, Kobie AG.  
644 Achieving SDGs and addressing health emergencies in Africa: strengthening health  
645 promotion. *Glob Health Promot*. 2021;28:97–103.
- 646 60. Kaswa M, Minga G, Nkiere N, Mingiedi B, Eloko G, Nguhiu P, et al. The economic  
647 burden of TB-affected households in DR Congo. *The International Journal of Tuberculosis  
648 and Lung Disease*. 2021;25:923.
- 649 61. Edginton M, Sekatane CS, Goldstein S. Patients' beliefs: do they affect tuberculosis  
650 control? A study in a rural district of South Africa. *Int J Tuberc Lung Dis*. 2002.
- 651 62. Courtwright A, Turner AN. Tuberculosis and Stigmatization: Pathways and Interventions.  
652 *Public Health Reports*. 2010;125 Suppl 4:34.
- 653 63. Amo-Adjei J. Individual, household and community level factors associated with keeping  
654 tuberculosis status secret in Ghana. *BMC Public Health*. 2016;16:1–9.

- 655 64. Somma D, Thomas BE, Karim F, Kemp J, Arias N, Auer C, et al. Gender and socio-  
656 cultural determinants of TB-related stigma in Bangladesh, India, Malawi and Colombia. *INT*  
657 *J TUBERC LUNG DIS*. 2008;12:856–66.
- 658 65. Msoka EF, Orina F, Sanga ES, Miheso B, Mwanyonga S, Meme H, et al. Qualitative  
659 assessment of the impact of socioeconomic and cultural barriers on uptake and utilisation of  
660 tuberculosis diagnostic and treatment tools in East Africa: a cross-sectional study. *BMJ Open*.  
661 2021;11:e050911.
- 662 66. Sabiiti W. Beyond the Numbers: Interpreting WHO’s Global Tuberculosis Report 2016 to  
663 Inform TB Policy and Practice in the East African Community. *East Afr Health Res J*.  
664 2017;1:2–7.
- 665 67. Barter DM, Agboola SO, Murray MB, Bärnighausen T. Tuberculosis and poverty: The  
666 contribution of patient costs in sub-Saharan Africa - A systematic review. *BMC Public*  
667 *Health*. 2012;12:1–21.
- 668 68. A global action framework for TB research in support of the third pillar of WHO’s end  
669 TB strategy. <https://www.who.int/publications/i/item/9789241509756>. Accessed 27 Mar  
670 2023.
- 671 69. Lienhardt C, Lönnroth K, Menzies D, Balasegaram M, Chakaya J, Cobelens F, et al.  
672 Translational Research for Tuberculosis Elimination: Priorities, Challenges, and Actions.  
673 *PLoS Med*. 2016;13:e1001965.
- 674 70. Theobald S, Taegtmeier M, Squire SB, Crichton J, Simwaka BN, Thomson R, et al.  
675 Towards building equitable health systems in Sub-Saharan Africa: Lessons from case studies  
676 on operational research. *Health Res Policy Syst*. 2009;7:1–8.
- 677 71. Gross JM, McCarthy CF, Verani AR, Iliffe J, Kelley MA, Hepburn KW, et al. Evaluation  
678 of the impact of the ARC program on national nursing and midwifery regulations, leadership,

679 and organizational capacity in East, Central, and Southern Africa. BMC Health Serv Res.

680 2018;18:1–11.

681 72. Harries AD, Thekkur P, Mbithi I, Chakaya JM, Tweya H, Takarinda KC, et al. Real-Time

682 Operational Research: Case Studies from the Field of Tuberculosis and Lessons Learnt. Trop

683 Med Infect Dis. 2021;6.

684

685

686

687

688

689

690

691

692

693

694

695

696

697

698

699

700

701

702

703

704 **List of abbreviations**

705 AIDS: Acquired Immune Deficiency Syndrome; CHVs: Community Health Volunteers;  
706 HIV: Human Immuno-deficiency Virus; KII: Key Informant Interview; KELIN: Kenya Legal  
707 & Ethical Issues Network on HIV and AIDS; PEA: Political Economy Analysis; TB:  
708 Tuberculosis; WHO: World Health Organization.

709 **Declarations**

710 Ethics Approval and consent to participate

711 The qualitative study obtained ethics approval from Kenya Medical Research Institute  
712 (SERU number 4205). All participants provided written informed consent before  
713 participation in the study.

714 Consent for publication

715 Not applicable.

716 Availability of data and materials

717 The data used and/or analysed during the current study are available from the corresponding  
718 author on request.

719 Competing Interests

720 The authors declare that they have no competing interests.

721 Funding

722 UK aid provided funding for this research. The content is solely the responsibility of the  
723 authors and does not necessarily represent the official views of UK aid. The funders had no  
724 role in the design of the study and data collection, analysis, and interpretation of data and in  
725 writing the manuscript or decision to publish.

726 Authors contributions

727 All study authors were involved in the conceptualization of the study. EZ and JC provided  
728 overall guidance on study design and manuscript preparation. LA was involved in project



729 management. IM, HK and LA were involved in data collection, data coding and analytic  
730 support, and manuscript preparation. All authors were involved in drafting various sections of  
731 the initial manuscript. All authors read and approved the final manuscript.

### 732 **Acknowledgements**

733 The study was part of the LIGHT programme. LIGHT is a cross-disciplinary global health  
734 research programme funded with UK aid from the UK government in partnership between  
735 the UK and 6 partners institute: African Institute for Development Policy (AFIDEP), Kenya  
736 and Malawi; Zankli Research Center - Bingham University (ZRC), Nigeria; Malawi-  
737 Liverpool-Wellcome Trust Clinical Research Programme (MLW), Malawi; Respiratory  
738 Society of Kenya (ReSOK), Kenya; Makerere University Lung Institute (MLI), Uganda and  
739 Liverpool School of Tropical Medicine (LSTM) Leaving no-one behind; transforming  
740 Gendered pathways to Health for TB (LIGHT) Consortium.

741

742
